# Supplementary material
Source: publisher site journal article supplement (https://www.dovepress.com/article/479660)
Supplement: Supplementary file 1 [file get_supplementary_file.php]

Supplementary Table 1 Definitions of complications in children with sepsis

| Complication | Diagnostic criteria |
| --- | --- |
| Anaemia | Haemoglobin 1-4 months: < 90 g/L |
|  | 4-6 months: < 100 g/L |
|  | 6 months to 5 years: < 110 g/L |
|  | 5-12years: < 115 g/L |
|  | >12years: < 120 g/L |
| Hypertension | Systolic blood pressure ≥ 120 mmHg or diastolic blood pressure ≥ 80 mmHg |
| Liver dysfunction | Total bilirubin > 68.4 mmol/L or elevation of alanine aminotransferase exceeding 2 times the upper limit |
|  | of normal (40 IU/L) |
| Renal dysfunction | Serum creatinine level greater than 2 times the upper limit of normal for age-matched peers |
| Hypoproteinemia | Serum total protein < 60 g/L or albumin < 35 g/L |

Supplementary Table 2 Multivariable logistic regression model for assessing the risk of in-hospital mortality in children with sepsis

| Variables | Unadjusted OR | 95% CI | P | Adjusted OR | 95% CI | P |
| --- | --- | --- | --- | --- | --- | --- |
| Age |  | | | | | |
| <1years | Reference | | | Reference | | |
| 1-6 years | 1.01 | 0.50-2.02 | 0.988 | 0.82 | 0.29-2.37 | 0.718 |
| >6 years | 1.04 | 0.45-2.44 | 0.923 | 0.55 | 0.16-1.87 | 0.335 |
| Gender (female) | 0.91 | 0.48-1.70 | 0.760 | 0.60 | 0.27-1.37 | 0.226 |
| Respiratory system infection | 1.37 | 0.70-2.69 | 0.362 | 0.95 | 0.36-2.47 | 0.909 |
| Digestive system infection | 0.75 | 0.38-1.50 | 0.414 | 1.65 | 0.68-4.03 | 0.271 |
| Blood system infection | 1.80 | 0.95-3.42 | 0.071 | 1.57 | 0.70-3.52 | 0.275 |
| Laboratory tests |  |  |  |  |  |  |
| High-sensitivity CRP (>10 mg/dL) | 0.49 | 0.26-0.95 | 0.034 | 0.45 | 0.20-1.01 | 0.053 |
| Procalcitonin (>0.5 ng/mL) | 0.89 | 0.34-2.36 | 0.816 | 0.41 | 0.11-1.56 | 0.193 |
| CKMB（>6.8 ng/mL） | 1.50 | 0.74-3.07 | 0.264 | 0.47 | 0.17-1.28 | 0.141 |
| Serum sodium (<135 or >145 mmol/L) | 1.62 | 0.87-3.03 | 0.131 | 1.30 | 0.56-3.02 | 0.544 |
| Potassium (<3.5 or >5.5 mmol/L) | 1.49 | 0.78-2.85 | 0.224 | 0.55 | 0.23-1.32 | 0.178 |
| Calcium (<2.2 or >2.7 mmol/L) | 2.12 | 1.02-4.42 | 0.044 | 1.56 | 0.58-4.16 | 0.377 |
| Arterial blood pH (<7.35 or >7.45) | 2.26 | 1.18-4.34 | 0.014 | 1.12 | 0.46-2.69 | 0.808 |
| Arterial blood lactate (>2 mmol/L) | 4.07 | 2.10-7.87 | <0.001 | 3.44 | 1.49-7.91 | 0.004 |
| APTT（>49.1 s） | 2.82 | 1.46-5.45 | 0.002 | 1.59 | 0.64-3.92 | 0.319 |
| Fibrinogen (<2 or >4 g/L) | 1.37 | 0.73-2.58 | 0.330 | 0.73 | 0.31-1.72 | 0.473 |
| Complications |  |  |  |  |  |  |
| Anemia | 1.98 | 0.95-4.12 | 0.069 | 1.39 | 0.51-3.78 | 0.518 |
| Hypertension | 0.38 | 0.13-1.12 | 0.079 | 0.34 | 0.10-1.16 | 0.085 |
| Liver dysfunction | 2.60 | 1.34-5.04 | 0.005 | 1.36 | 0.56-3.29 | 0.495 |
| Renal dysfunction | 2.32 | 0.99-5.45 | 0.053 | 0.55 | 0.16-1.86 | 0.334 |
| Hypoproteinemia | 1.97 | 0.86-4.49 | 0.107 | 1.34 | 0.41-4.37 | 0.623 |
| PCIS | 0.91 | 0.88-0.94 | <0.001 | 0.93 | 0.89-0.97 | 0.001 |
| NLPR (>2.34) | 3.42 | 1.73-6.77 | <0.001 | 8.31 | 3.69-18.68 | <0.001 |

Abbreviations: APTT, activated partial thromboplastin time; CKMB, creatine kinase isoenzymes; CRP, c-reactive protein; ICU, intentive care unit; NLPR, neutrophil to lymphocyte and platelet ratio; PCIS, pediatric critical illness score.

Supplementary Table 3 Comparison of variables after propensity score matching (sensitivity analysis)

| Variables | All Patients | Low NLPR | High NLPR | P |
| --- | --- | --- | --- | --- |
|  | (n=110) | (n=55) | (n=55) |
| Age, months | 21 (7-66) | 14 (4-76) | 31 (8-59) | 0.305 |
| Laboratory tests |  |  |  |  |
| Procalcitonin, ng/mL | 6.69 (2.00-34.33) | 6.69 (1.44-35.53) | 7.49 (2.25-34.33) | 0.550 |
| Serum calcium, mmol/L | 2.06 (1.90-2.19) | 2.03 (1.82-2.19) | 2.06 (1.95-2.20) | 0.425 |
| Fibrinogen, g/L | 2.33 (1.72-3.88) | 2.34 (1.76-3.55) | 2.30 (1.69-3.94) | 0.938 |
| Arterial blood lactate, mmol/L | 1.7 (1.1-2.8) | 2.2 (1.1-3.3) | 1.6 (1.0-2.2) | 0.206 |
| Complications, n (%) |  |  |  |  |
| Anemia | 80 (72.7) | 38 (69.1) | 42 (76.4) | 0.392 |
| Liver dysfunction | 33 (30.0) | 18 (32.7) | 15 (27.3) | 0.533 |
| Renal dysfunction | 11 (10.0) | 6 (10.9) | 5 (9.1) | 0.751 |
| PCIS | 84 (76-88) | 84 (74-88) | 84 (78-90) | 0.370 |
| Secondary clinical outcomes |  |  |  |  |
| Mechanical ventilation, n (%) | 62 (56.4) | 30 (54.5) | 32 (58.2) | 0.701 |
| ICU length of stay, days | 5.0 (2.2-10.0) | 5.0 (2.3-10.5) | 4.8 (1.7-9.4) | 0.243 |
| 30-day mortality, n (%) | 25 (22.7) | 8 (14.5) | 17 (30.9) | 0.041 |
| Primary clinical outcome |  |  |  |  |
| In-hospital mortality, n (%) | 29 (26.4) | 9 (16.4) | 20 (36.4) | 0.017 |

Abbreviations: ICU, intentive care unit; NLPR, neutrophil to lymphocyte and platelet ratio; PCIS, pediatric critical illness score.

Supplementary Table 4 Area under the curve (AUC) values for predicting hospital mortality in children with sepsis using NLPR and PCIS scores for different age groups (sensitivity analysis).

| Age ≤ 16 months | | |  | Age > 16 months | | |
| --- | --- | --- | --- | --- | --- | --- |
| Variable | AUC | 95% CI |  | Variable | AUC | 95% CI |
| NLPR | 0.796 | 0.690-0.902 |  | NLPR | 0.742 | 0.626-0.858 |
| PCIS | 0.729 | 0.627-0.831 |  | PCIS | 0.753 | 0.643-0.863 |


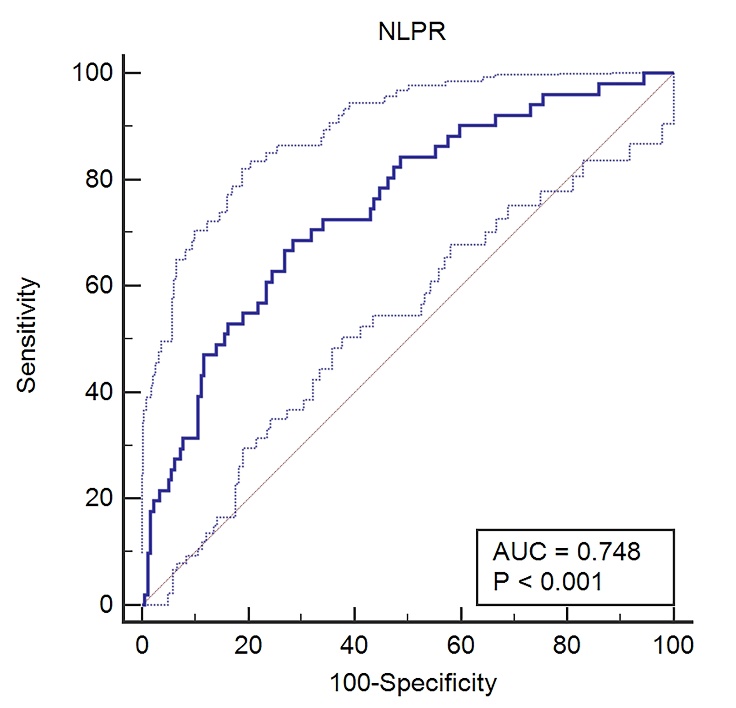


Supplementary Figure 1 Receiver operating characteristic curves for predicting hospital mortality in children with sepsis using the neutrophil-to-lymphocyte and platelet ratio (NLPR). Dashed lines represent 95% confidence intervals.

Abbreviations: AUC, area under the curve.


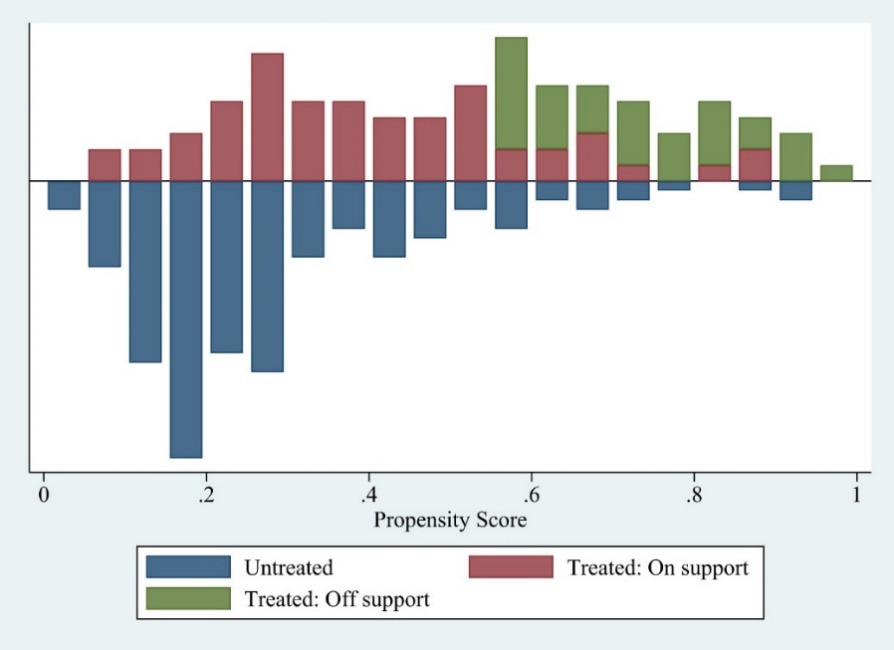


Supplementary Figure 2 Propensity scores for the high NLPR group and low NLPR group.


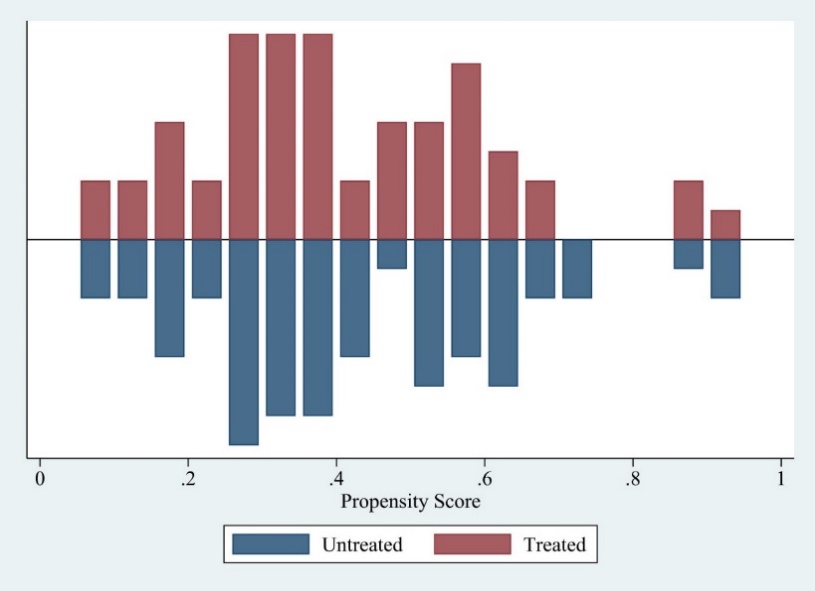


Supplementary Figure 3 Propensity scores for the high NLPR group and low NLPR group after sensitivity analysis.
